# Supplementary material for: Integration of Non-Targeted Metabolomics and Targeted Quantitative Analysis to Elucidate the Synergistic Antidepressant Effect of Bupleurum Chinense DC-Paeonia Lactiflora Pall Herb Pair by Regulating Purine Metabolism
Source: Front Pharmacol. 2022 Jun 30;13:900459. doi: 10.3389/fphar.2022.900459 (PMC9280301; doi:10.3389/fphar.2022.900459)
Supplement: Supplementary file 1 [file DataSheet1.DOC]

**Table S1** Mobile phase and injection time.

| Time(min) | Solvent A | Solvent B |
| --- | --- | --- |
| (0.1% Formic acid water) | (Acetonitrile) |
| 0~2 | 98% A | 2% B |
| 2~3 | 98~65% A | 2~35% B |
| 3~10 | 65%~30% A | 35~70% B |
| 10~12 | 30~15% A | 70~85% B |
| 12~16 | 15%~2% A | 85~98% B |
| 16~18 | 2% A | 98% B |
| 18~20 | 2%~98% A | 98~2% B |
| 20~23 | 98%A | 2% B |

**Table S2** Targeted metabolites and internal standard reference substances.

| No. | Compounds | Specifications | Molecular weight | CAS | Stock solution（mg/mL） | Mixed standard range（μg/mL） |
| --- | --- | --- | --- | --- | --- | --- |
| 1 | AMP | 1000 mg | 347.22 | 61-19-8 | 4.17 | 0.3125-80 |
| 2 | IMP | 5 mg | 348.21 | 131-99-7 | 1.00 | 0.3125-80 |
| 3 | GMP | 500 mg | 407.18 | 5550-12-9 | 7.00 | 0.46875-120 |
| 4 | Adenine | 500 mg | 135.13 | 73-24-5 | 4.30 | 0.3125-80 |
| 5 | Hypoxanthine | 10 mg | 136.11 | 68-94-0 | 1.00 | 0.78125-200 |
| 6 | Xanthine | 100 mg | 152.11 | 69-89-6 | 4 .00 | 0.3125-80 |
| 7 | Guanine | 500 mg | 151.13 | 73-40-5 | 2.16 | 0.3125-80 |
| 8 | Adenosine | 500 mg | 267.25 | 58-61-7 | 5.76 | 0.3125-80 |
| 9 | Inosine | 500 mg | 268.23 | 58-63-9 | 20.53 | 3.125-800 |
| 10 | Xanthosine | 5 mg | 284.23 | 146-80-5 | 2.24 | 0.3125-80 |
| 11 | Guanosine | 500 mg | 283.24 | 118-00-3 | 6.16 | 0.3125-80 |
| 12 | IS1 | 5 mg | 301.69 | 146-77-0 | 1.00 | 1.2 |
| 13 | IS2 | 5 mg | 287.35 | 357-70-0 | 1.00 | 0.15 |

**Table S3** Preparation of quality control solution.

| Compounds | QC1 | QC2 | QC3 | LLOQ |
| --- | --- | --- | --- | --- |
| AMP, IMP, Adenine, Xanthine, Guanine, Adenosine, Xanthine, Guanosine | 40 μg/mL | 5 μg/mL | 0.625 μg/mL | 0.3125  μg/mL |
| GMP | 60 μg/mL | 7.5 μg/mL | 0.9375 μg/mL | 0.46875 μg/mL |
| Hypoxanthine | 100 μg/mL | 12.5 μg/mL | 1.5625 μg/mL | 0.78125 μg/mL |
| Inosine | 400 μg/mL | 50 μg/mL | 6.25 μg/mL | 3.125  μg/mL |

**Table S4** The RSD values of the relative peak areas of 20 random ions in the 6 QC samples.

| NO. | m/z | TR  (min) | Relative  peak area | RSD  (%) | Ion mode |
| --- | --- | --- | --- | --- | --- |
| 1 | 148.0419 | 1.017 | 0.0112 | 11.34 | + |
| 2 | 132.1018 | 1.250 | 0.0080 | 11.41 | + |
| 3 | 268.1035 | 1.252 | 0.0021 | 9.03 | + |
| 4 | 269.0876 | 1.258 | 0.0056 | 4.14 | + |
| 5 | 198.0371 | 1.310 | 0.0069 | 13.13 | + |
| 6 | 132.1018 | 2.687 | 0.0024 | 9.64 | + |
| 7 | 149.0596 | 4.595 | 0.0042 | 11.79 | + |
| 8 | 205.097 | 4.907 | 0.0026 | 14.15 | + |
| 9 | 275.2773 | 8.262 | 0.0023 | 5.92 | + |
| 10 | 274.2736 | 8.263 | 0.0147 | 7.00 | + |
| 11 | 362.3259 | 8.460 | 0.0013 | 5.90 | + |
| 12 | 496.3213 | 11.722 | 0.0132 | 10.62 | + |
| 13 | 523.3582 | 12.258 | 0.0012 | 5.60 | + |
| 14 | 149.0232 | 13.095 | 0.0028 | 9.69 | + |
| 15 | 524.3707 | 13.413 | 0.0025 | 8.25 | + |
| 16 | 485.3156 | 14.207 | 0.0036 | 6.24 | + |
| 17 | 352.3024 | 14.548 | 0.0035 | 8.00 | + |
| 18 | 256.2631 | 14.814 | 0.0081 | 11.22 | + |
| 19 | 291.2677 | 15.558 | 0.0010 | 6.12 | + |
| 20 | 141.9832 | 20.587 | 0.0043 | 14.1 | + |


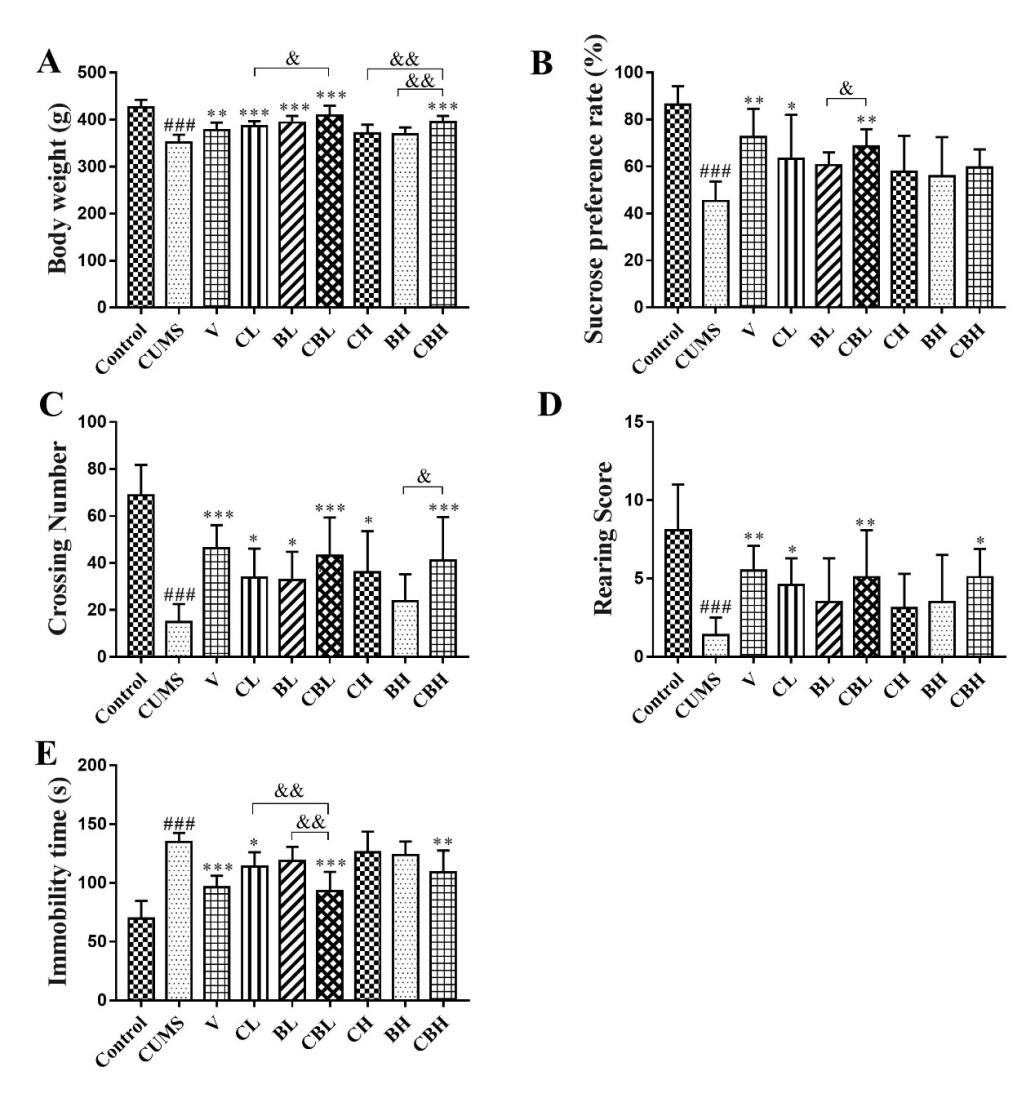


**Figure S1** Comparison of antidepressant effect between Chaihu and Baishao before and after compatibility. **(A)** Body weight. **(B)** Sucrose preference. **(C)** The crossing number in OFT. **(D)** The rearing score in OFT. **(E)** Immobility time in FST. All data were expressed as mean ± SD, n = 9. Compared with control group: ###*P*0.001; compared with CUMS group: **P*0.05 ***P*0.01 ****P*0.001; compared with Chaihu-Baishao group: &*P*0.05, &&*P*0.01, &&&*P*0.001.


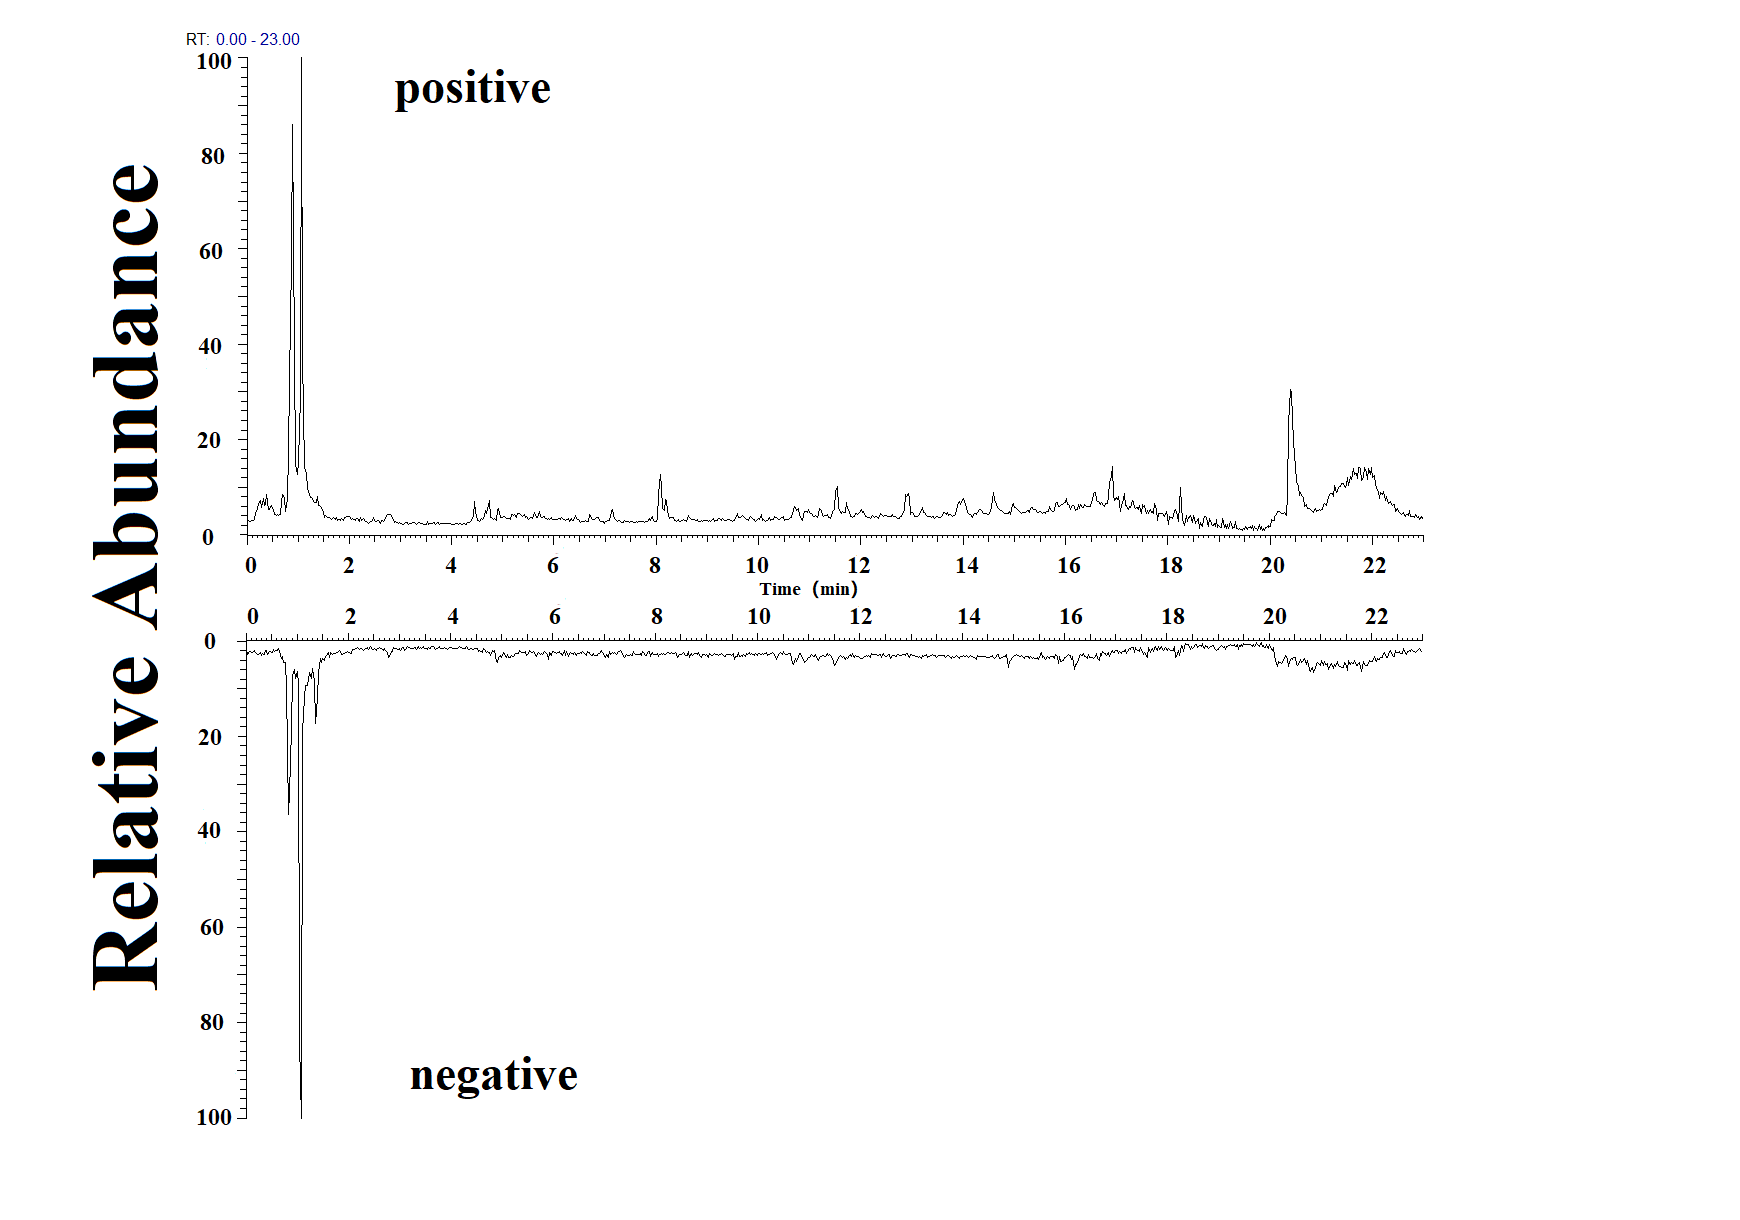


**Figure S2** Typical LC-MS/MS spectrum of control rat cortex.


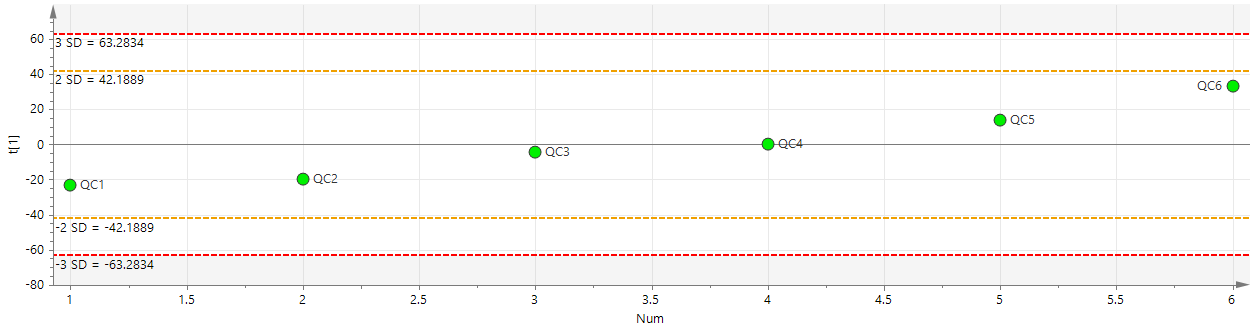


**Figure S3** The deviation of QC samples.

**Methodological validation of targeted quantitative analysis**

**1 Selectivity**

The total ion chromatogram and MRM chromatogram of the blank solution, QC-2 and normal rat cerebral cortex sample were shown in Figure S4.


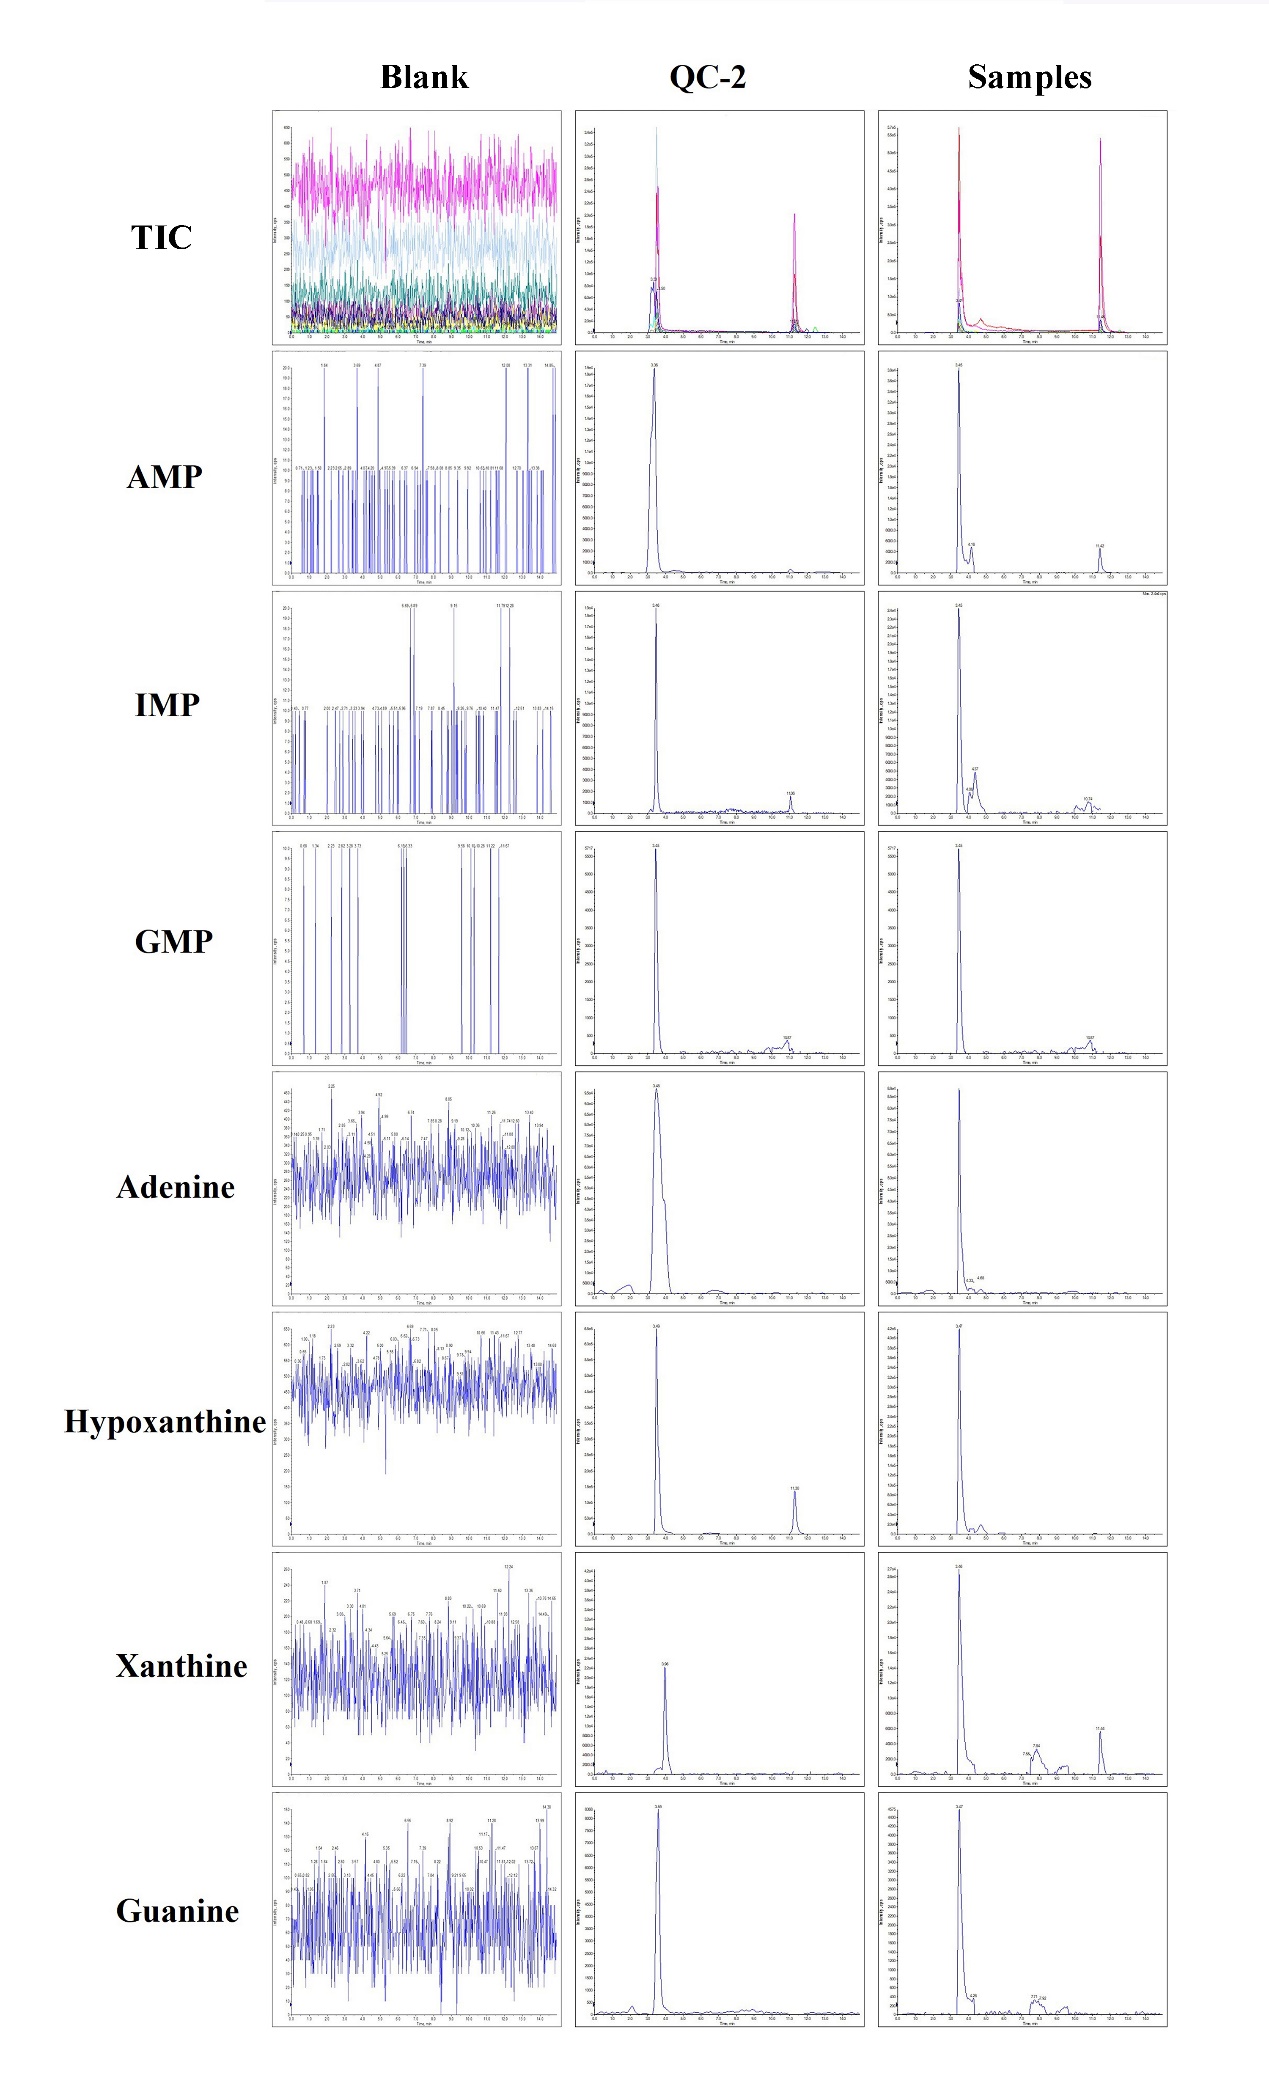


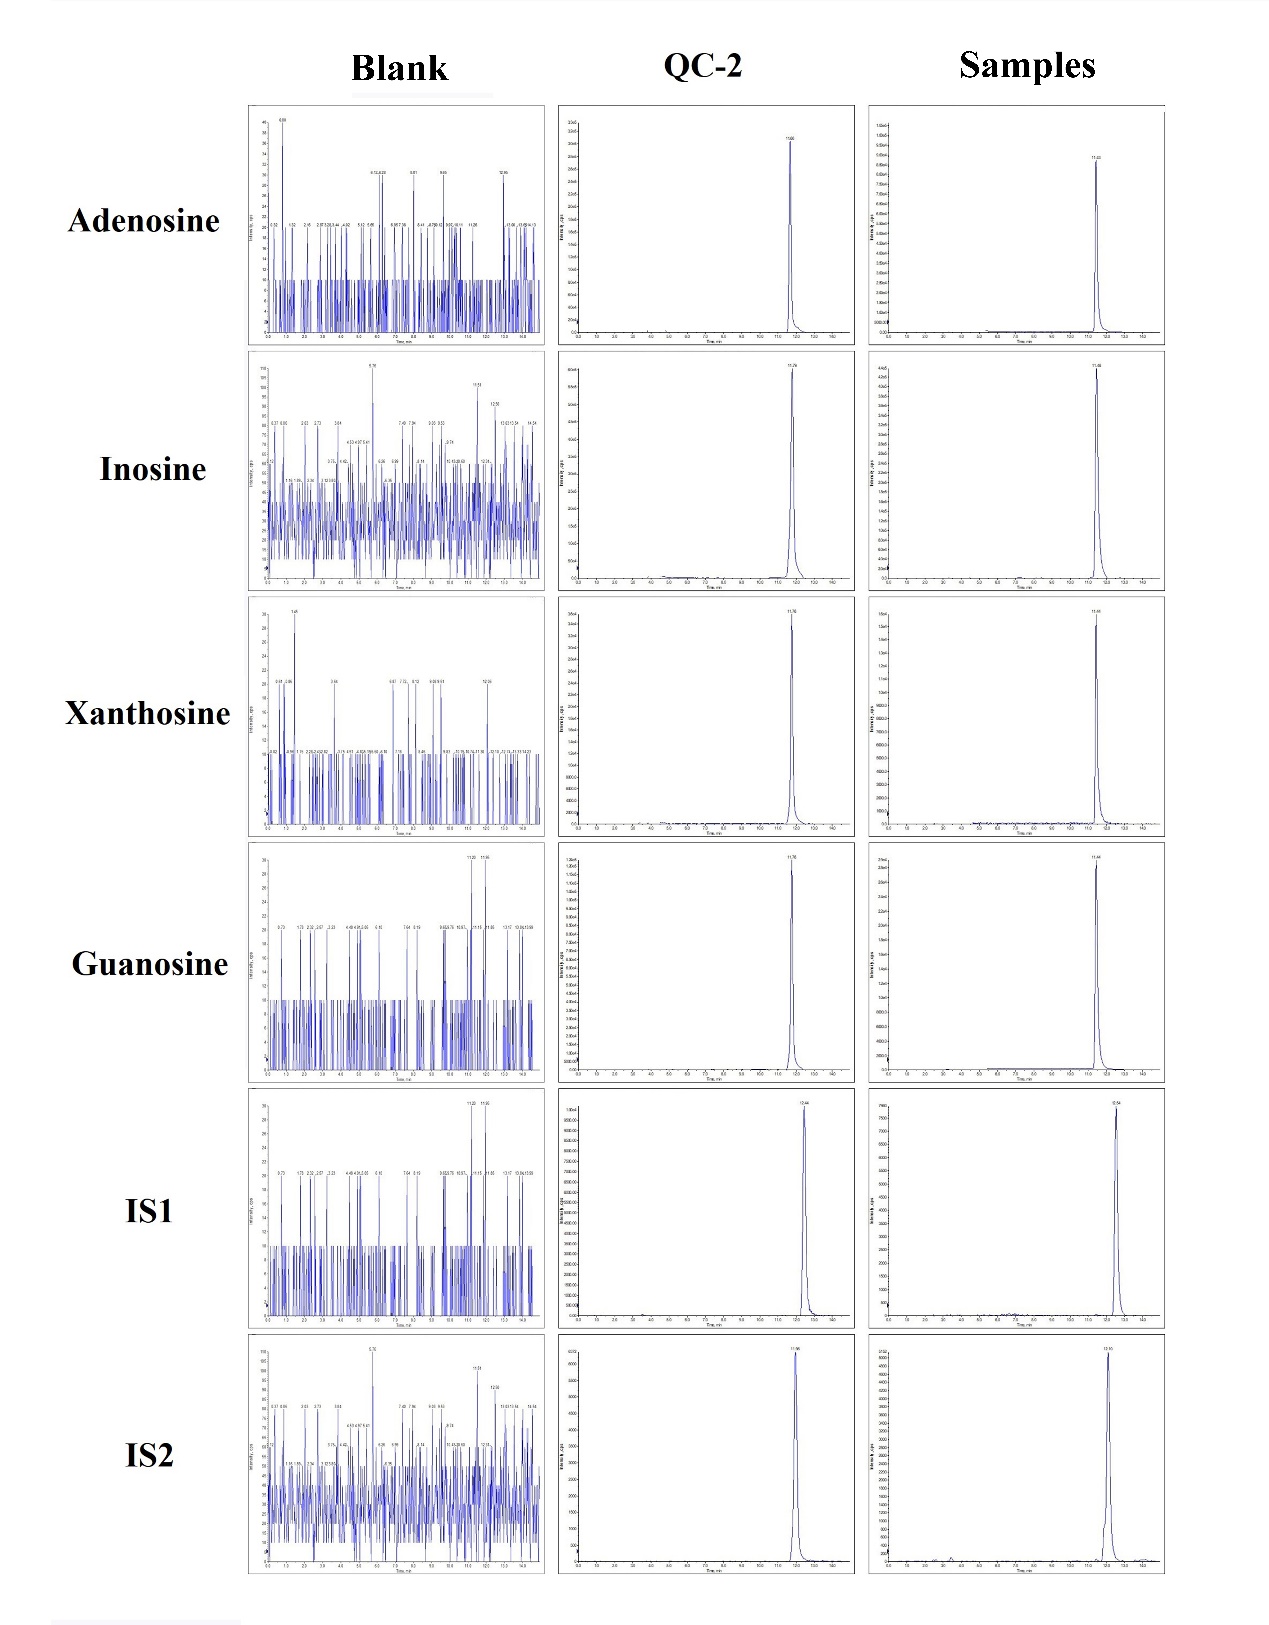


**Figure S4** Selectivity.

**2 Linearity and concentration range**

The regression equation, correlation coefficient (R2), linear range and corresponding internal standard were shown in Table S5. As shown in Figure S5, 11 metabolites in purine metabolism have good linearity.

**Table S5** Linearity relationship of 11 metabolites in purine metabolism.

| Metabolites | TR  (min) | Regression equation (n = 9) | R2 | Range  (μg/mL) | LLOQ | LOD | IS |
| --- | --- | --- | --- | --- | --- | --- | --- |
| Adenine | 3.34 | y=0.6257x+1.2885 | 0.9998 | 0.3125-80 | 0.3125 | 0.104167 | IS2 |
| Hypoxanthine | 3.53 | y=0.306x+0.2602 | 0.9994 | 0.78125-200 | 0.78125 | 0.260417 | IS2 |
| Xanthine | 3.43 | y=0.1477x+0.1554 | 0.9966 | 0.3125-80 | 0.3125 | 0.104167 | IS2 |
| Guanine | 3.38 | y=0.0561x+0.08 | 1.0000 | 0.3125-80 | 0.3125 | 0.104167 | IS2 |
| Adenosine | 11.18 | y=2.27x-0.1066 | 0.9997 | 0.3125-80 | 0.3125 | 0.104167 | IS1 |
| Inosine | 11.28 | y=0.272x+3.4985 | 0.9978 | 3.125-800 | 3.125 | 1.041667 | IS1 |
| Xanthosine | 11.26 | y=0.145x+0.0559 | 0.9996 | 0.3125-80 | 0.3125 | 0.104167 | IS1 |
| Guanosine | 11.26 | y=0.3931x+0.045 | 0.9998 | 0.3125-80 | 0.3125 | 0.104167 | IS1 |
| AMP | 3.32 | y=0.154x-0.094 | 0.9998 | 0.3125-80 | 0.3125 | 0.104167 | IS2 |
| IMP | 3.43 | y=0.0393x+0.0167 | 0.9996 | 0.3125-80 | 0.3125 | 0.104167 | IS2 |
| GMP | 3.41 | y=0.0291x+0.0456 | 0.9998 | 0.46875-120 | 0.46875 | 0.15625 | IS2 |

**
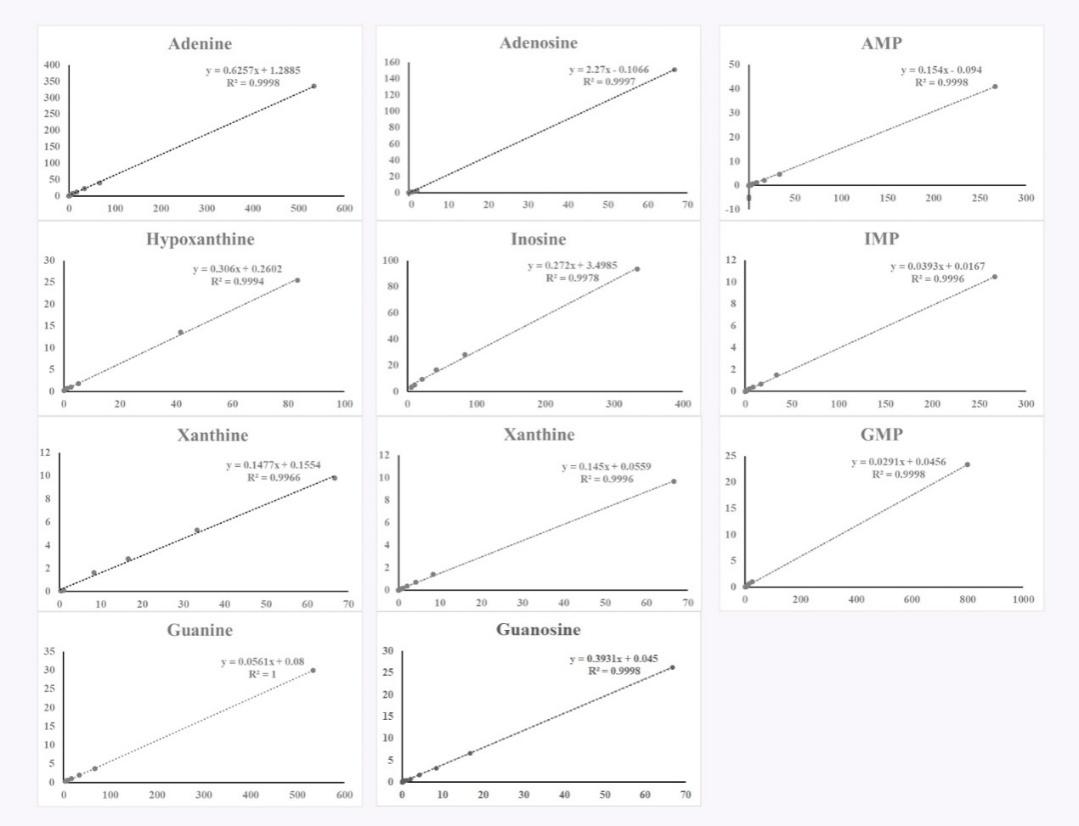
**

**Figure S5** Standard curves of 11 metabolites in purine metabolism.

**3 Precision**

As shown in Table S6, the precision deviation met the requirement under the established method, indicating that the established method was suitable for the detection of samples.

**Table S6** The RSD values of the intra-day and inter-day precision of 11 metabolites.

| Metabolites | Theoretical concentration (μg/mL) | Intra-day (n = 6) | | Inter-day (n = 6) | |
| --- | --- | --- | --- | --- | --- |
| Measured (μg/mL) | RSD (%) | Measured  (μg/mL) | RSD (%) |
| Adenine | 40 | 37.411.687 | 4.45 | 38.913.008 | 4.49 |
| 5 | 4.9310.047 | 1.96 | 4.8880.110 | 2.24 |
| 0.625 | 0.55720.024 | 5.62 | 0.56540.031 | 5.55 |
| 0.3125 | 0.3090.009 | 2.36 | 0.31320.009 | 2.99 |
| Hypoxanthine | 100 | 88.943.951 | 4.69 | 89.63.984 | 4.45 |
| 12.5 | 12.30.491 | 3.12 | 12.090.507 | 4.20 |
| 1.5625 | 1.1940.041 | 3.65 | 1.230.051 | 4.12 |
| 0.78125 | 0.78950.015 | 3.25 | 0.78450.025 | 3.23 |
| Xanthine | 40 | 31.721.753 | 4.45 | 31.671.421 | 4.49 |
| 5 | 4.4820.103 | 3.58 | 4.4640.172 | 3.84 |
| 0.625 | 0.58720.015 | 3.78 | 0.6060.026 | 4.33 |
| 0.3125 | 0.22750.009 | 5.59 | 0.21710.025 | 11.43 |
| Guanine | 40 | 38.532.453 | 6.05 | 39.232.326 | 5.93 |
| 5 | 4.6950.308 | 5.19 | 4.7520.341 | 7.18 |
| 0.625 | 0.64260.019 | 5.02 | 0.64110.032 | 4.98 |
| 0.3125 | 0.29580.011 | 4.18 | 0.29870.014 | 4.53 |
| Adenosine | 40 | 39.071.531 | 4.59 | 38.841.731 | 4.46 |
| 5 | 4.7310.146 | 4.17 | 5.0880.343 | 6.73 |
| 0.625 | 0.53690.029 | 3.41 | 0.53360.020 | 3.83 |
| 0.3125 | 0.30880.005 | 1.58 | 0.30710.005 | 1.65 |
| Inosine | 400 | 412.117.130 | 4.91 | 406.220.210 | 4.98 |
| 50 | 43.232.862 | 5.68 | 44.172.677 | 6.06 |
| 6.25 | 5.4970.359 | 5.72 | 5.5230.307 | 5.55 |
| 3.125 | 3.3490.249 | 8.94 | 3.4820.339 | 9.72 |
| Xanthosine | 40 | 39.61.618 | 4.80 | 39.311.858 | 4.73 |
| 5 | 5.220.364 | 5.25 | 5.4650.359 | 6.57 |
| 0.625 | 0.40580.042 | 9.08 | 0.37780.042 | 11.22 |
| 0.3125 | 0.34180.015 | 11.22 | 0.31980.039 | 15.76 |
| Guanosine | 40 | 38.461.555 | 4.30 | 38.011.574 | 4.14 |
| 5 | 4.1760.147 | 4.37 | 4.40.252 | 5.74 |
| 0.625 | 0.60680.062 | 9.16 | 0.5970.053 | 8.97 |
| 0.3125 | 0.31920.017 | 4.83 | 0.31070.016 | 5.12 |
| AMP | 40 | 34.751.582 | 4.79 | 34.721.675 | 4.82 |
| 5 | 5.0380.114 | 2.27 | 4.9360.142 | 2.87 |
| 0.625 | 0.59380.016 | 2.87 | 0.60210.017 | 2.89 |
| 0.3125 | 0.32910.048 | 6.57 | 0.32340.036 | 11.26 |
| IMP | 40 | 38.91.700 | 4.77 | 38.61.793 | 4.65 |
| 5 | 5.1440.332 | 4.18 | 5.0340.236 | 4.68 |
| 0.625 | 0.59390.014 | 3.26 | 0.60120.020 | 3.26 |
| 0.3125 | 0.31330.012 | 5.03 | 0.30330.024 | 8.02 |
| GMP | 60 | 58.432.995 | 4.59 | 58.113.203 | 5.51 |
| 7.5 | 7.3930.071 | 1.83 | 7.4310.144 | 1.94 |
| 0.9375 | 1.2190.127 | 6.73 | 1.3660.139 | 10.15 |
| 0.46875 | 0.37080.017 | 7.60 | 0.32810.062 | 18.82 |

**4 Stability**

As shown in Table S7, the RSD values of two different treatments met the requirement, indicating that the established method was stable for the detection of the samples.

**Table S7** Stability of 11 metabolites in purine metabolism.

| Metabolites  (n = 3) | Theoretical concentration (μg/mL) | Repeated freeze-thaw 3 times at -20 °C | | Placed in an autosampler at 4 °C for 24 hours | |
| --- | --- | --- | --- | --- | --- |
| Measured (μg/mL) | RSD  (%) | Measured (μg/mL) | RSD (%) |
| Adenine | 40 | 38.642.034 | 5.26 | 38.882.454 | 6.31 |
| 0.625 | 0.54890.020 | 3.58 | 0.54580.030 | 5.44 |
| Hypoxanthine | 100 | 87.552.234 | 2.55 | 88.783.425 | 3.86 |
| 1.5625 | 1.2130.031 | 2.52 | 1.2150.035 | 2.92 |
| Xanthine | 40 | 31.750.402 | 1.27 | 31.620.869 | 2.75 |
| 0.625 | 0.59130.015 | 2.47 | 0.60020.029 | 4.73 |
| Guanine | 40 | 38.661.579 | 4.08 | 39.032.337 | 5.99 |
| 0.625 | 0.62610.039 | 6.24 | 4.160.244 | 5.85 |
| Adenosine | 40 | 39.081.210 | 3.10 | 40.11.012 | 2.52 |
| 0.625 | 0.52040.016 | 3.12 | 0.53260.020 | 3.79 |
| Inosine | 400 | 397.58.775 | 2.21 | 412.418.970 | 4.60 |
| 6.25 | 5.3710.128 | 2.38 | 5.4090.196 | 3.62 |
| Xanthosine | 40 | 39.420.620 | 1.57 | 40.21.325 | 3.30 |
| 0.625 | 0.3530.011 | 3.02 | 0.35460.012 | 3.27 |
| Guanosine | 40 | 38.770.719 | 1.85 | 38.950.914 | 2.35 |
| 0.625 | 0.59660.032 | 5.29 | 0.59590.031 | 5.19 |
| AMP | 40 | 35.21.804 | 5.12 | 34.381.890 | 5.50 |
| 0.625 | 0.59820.016 | 2.67 | 0.59780.021 | 3.54 |
| IMP | 40 | 39.280.856 | 2.18 | 38.380.991 | 2.58 |
| 0.625 | 0.6180.005 | 0.88 | 0.60560.024 | 3.89 |
| GMP | 60 | 59.661.386 | 2.32 | 57.933.193 | 5.51 |
| 0.9375 | 1.4350.012 | 0.84 | 1.4150.037 | 2.64 |

**5 Extraction recovery rate and matrix effect**

As shown in Table S8, the RSD values of extraction recovery rate ranged from 0.69% to 3.66%, and the RSD range of matrix effect was from 1.29% to 4.77%, indicating that the established method was stable and reliable in extraction recovery rate and matrix effect.

**Table S8** Extraction recovery rate and matrix effect of 11 metabolites in purine metabolism.

| Metabolites | Theoretical concentration (μg/mL) | Extraction recovery rate  (n = 6) | | Matrix effect  (n = 6) | |
| --- | --- | --- | --- | --- | --- |
| MeanSD (%) | RSD (%) | MeanSD (%) | RSD (%) |
| Adenine | 40 | 94.983.063 | 3.23 | 103.64.937 | 4.77 |
| 0.625 | 97.691.447 | 1.48 | 100.91.305 | 1.29 |
| Hypoxanthine | 100 | 97.751.985 | 2.03 | 102.43.629 | 3.54 |
| 1.5625 | 98.371.792 | 1.82 | 99.094.082 | 4.12 |
| Xanthine | 40 | 97.092.248 | 2.32 | 102.62.480 | 2.42 |
| 0.625 | 97.461.508 | 1.55 | 99.932.775 | 2.78 |
| Guanine | 40 | 96.812.223 | 2.30 | 101.64.196 | 4.13 |
| 0.625 | 95.692.499 | 2.61 | 100.23.150 | 3.14 |
| Adenosine | 40 | 97.133.028 | 3.12 | 98.762.697 | 2.74 |
| 0.625 | 98.770.857 | 0.87 | 97.082.721 | 2.80 |
| Inosine | 400 | 99.50.6883 | 0.69 | 99.721.978 | 1.98 |
| 6.25 | 96.283.014 | 3.13 | 98.092.059 | 2.10 |
| Xanthosine | 40 | 95.262.614 | 2.74 | 98.793.421 | 3.46 |
| 0.625 | 96.52.071 | 2.15 | 98.12.578 | 2.63 |
| Guanosine | 40 | 98.391.603 | 1.63 | 1002.483 | 2.48 |
| 0.625 | 94.221.729 | 1.84 | 97.312.637 | 2.71 |
| AMP | 40 | 95.583.499 | 3.66 | 1044.367 | 4.20 |
| 0.625 | 97.741.826 | 1.86 | 100.22.569 | 2.56 |
| IMP | 40 | 97.431.406 | 1.44 | 101.44.078 | 4.02 |
| 0.625 | 97.751.413 | 1.45 | 100.91.428 | 1.42 |
| GMP | 60 | 97.491.649 | 1.69 | 101.63.483 | 3.43 |
| 0.9375 | 95.062.960 | 3.11 | 100.22.351 | 2.35 |
| IS1 | 1.2 (QC1) | 96.951.998 | 2.06 | **-** | **-** |
| 1.2 (QC3) | 97.661.835 | 1.88 | **-** | **-** |
| IS2 | 0.15 (QC1) | 96.991.938 | 2.00 | **-** | **-** |
| 0.15 (QC3) | 97.631.943 | 1.99 | **-** | **-** |

**6 Dilution effect**

As shown in Table S9, the RSD values ranged from 0.05% to 1.07%, indicating that the method was stable and reliable in terms of dilution effect.

**Table S9** Dilution effect of 11 metabolites in purine metabolism.

| Metabolites | 128 times dilution (n = 5) | |
| --- | --- | --- |
| Measured (μg/mL) | RSD (%) |
| Adenine | 0.61890.002 | 0.40 |
| Hypoxanthine | 1.5520.005 | 0.30 |
| Xanthine | 0.60490.003 | 0.46 |
| Guanine | 0.61470.004 | 0.58 |
| Adenosine | 0.60840.004 | 0.73 |
| Inosine | 6.2120.024 | 0.39 |
| Xanthosine | 0.6070.005 | 0.76 |
| Guanosine | 0.61560.007 | 1.07 |
| AMP | 0.60280.001 | 0.20 |
| IMP | 0.61710.001 | 0.05 |
| GMP | 0.90470.002 | 0.18 |
